# Supplementary material for: Mapping Host-Related Correlates of Influenza Vaccine-Induced Immune Response: An Umbrella Review of the Available Systematic Reviews and Meta-Analyses
Source: PubMed Central journal article supplement (PMC6963823; doi:10.3390/vaccines7040215), 2019-12-13
Supplement: vaccines-07-00215-s001.pdf [file vaccines-07-00215-s001.pdf]

**Table S1.** List of excluded studies, with reasons

| Study                | Reason for exclusion                                                         |
|----------------------|------------------------------------------------------------------------------|
| Seidman, 2012        | No predefined control group                                                  |
| Beck, 2013           | Commentary on two published systematic reviews (both were included)          |
| Hua, 2013            | Conference abstract without sufficient details                               |
| Ramos, 2015          | Non-systematic nature of the review                                          |
| La Torre, 2016       | No predefined control group                                                  |
| Liao, 2016           | No predefined control group                                                  |
| Bekkat-Berkani, 2017 | No predefined control group                                                  |
| Chong, 2018          | Comparison of different influenza vaccine types                              |
| Zhang, 2018          | Comparison of different influenza vaccine types; no predefined control group |

**References:**

- Seidman, J.C.; Richard, S.A.; Viboud, C.; Miller, M.A. Quantitative review of antibody response to inactivated seasonal influenza vaccines. *Influenza Other Respir. Viruses* **2012**, *6*, 52–62.
- Beck, C.R.; McKenzie, B.C.; Hashim, A.B.; Harris, R.C.; Zanuzdana, A.; Agboado, G.; Orton, E.; Bécharde-Evans, L.; Morgan, G.; Stevenson, C.; et al. Influenza vaccination for immunocompromised patients: summary of a systematic review and meta-analysis. *Influenza Other Respir. Viruses* **2013**, *7* Suppl 2, 72–75.
- Hua, C.; Barnette, T.; Combe, B.; Morel, J. Influence of methotrexate, anti-tnf and rituximab on the immune response to influenza and pneumococcal vaccines in patients with rheumatoid arthritis: a systematic literature review and meta-analysis. *Ann. Rheum. Dis.* **2013**, *72*, A408.
- Ramos, I.; Fernandez-Sesma, A. Modulating the innate immune response to influenza A virus: Potential therapeutic use of anti-inflammatory drugs. *Front. Immunol.* **2015**, *6*, 361.
- La Torre, G.; Mannocci, A.; Colamesta, V.; D'Egidio, V.; Sestili, C.; Spadea, A. Influenza and pneumococcal vaccination in hematological malignancies: a systematic review of efficacy, effectiveness, and safety. *Mediterr. J. Hematol. Infect. Dis.* **2016**, *1*, 8, e2016044.
- Liao, Z.; Xu, X.; Liang, Y.; Xiong, Y.; Chen, R.; Ni, J. Effect of a booster dose of influenza vaccine in patients with hemodialysis, peritoneal dialysis and renal transplant recipients: A systematic literature review and meta-analysis. *Hum. Vaccin. Immunother.* **2016**, *12*, 2909–2915.
- Bekkat-Berkani, R.; Wilkinson, T.; Buchy, P.; Dos Santos, G.; Stefanidis, D.; Devaster, J.M.; Meyer, N. Seasonal influenza vaccination in patients with COPD: a systematic literature review. *BMC Pulm. Med.* **2017**, *17*, 79.
- Chong, P.P.; Handler, L.; Weber, D.J. A systematic review of safety and immunogenicity of influenza vaccination strategies in solid organ transplant recipients. *Clin. Infect. Dis.* **2018**, *66*, 1802–1811.
- Zhang, W.; Sun, H.; Atiquzzaman, M.; Sou, J.; Anis, A.H.; Cooper C. Influenza vaccination for HIV-positive people: Systematic review and network meta-analysis. *Vaccine* **2018**, *36*, 4077–4086.

**Table S2.** AMSTAR-2 (measurement tool for assessing systematic reviews, version 2) ratings, by paper and item.

| Study [Ref]         | Item |     |   |     |   |   |   |     |     |    |    |    |    |    |    |    |
|---------------------|------|-----|---|-----|---|---|---|-----|-----|----|----|----|----|----|----|----|
|                     | 1    | 2   | 3 | 4   | 5 | 6 | 7 | 8   | 9   | 10 | 11 | 12 | 13 | 14 | 15 | 16 |
| Baral [40]          | -    | -   | - | +/- | - | + | - | +/- | -   | -  | 0  | 0  | -  | 0  | 0  | +  |
| Pedersen [41]       | +    | -   | - | +/- | - | + | + | +   | +/- | -  | +  | -  | -  | +  | +  | -  |
| Beck [42]           | +    | -   | + | +   | + | + | - | +   | +   | -  | +  | -  | -  | +  | +  | +  |
| Agarwal [43]        | +    | -   | - | +/- | + | - | - | -   | -   | -  | 0  | 0  | -  | 0  | 0  | +  |
| Beck [44]           | +    | -   | + | +   | + | + | - | +   | +   | -  | +  | -  | -  | +  | +  | +  |
| Eckerle [45]        | +    | -   | - | +/- | + | - | - | +   | -   | -  | +  | -  | -  | +  | -  | +  |
| Goossen [46]        | +    | +   | - | +   | + | + | + | +   | +   | -  | 0  | 0  | +  | 0  | 0  | +  |
| Hua [47]            | +    | +/- | - | +/- | - | + | - | -   | +   | -  | +  | -  | -  | +  | -  | -  |
| McMahan [48]        | -    | -   | - | -   | - | - | - | -   | +   | -  | 0  | 0  | -  | 0  | 0  | +  |
| Pascoe [49]         | +    | -   | - | +/- | + | + | - | +   | -   | -  | 0  | 0  | -  | 0  | 0  | +  |
| Posteraro [50]      | +    | -   | - | +/- | + | + | - | +   | +   | -  | +  | -  | -  | -  | -  | +  |
| Shehata [51]        | -    | -   | - | -   | - | + | - | -   | -   | -  | 0  | 0  | -  | 0  | 0  | +  |
| Karbasi-Afshar [52] | -    | -   | - | -   | - | - | - | -   | +   | -  | -  | -  | -  | -  | -  | +  |
| Nguyen [53]         | -    | -   | - | +/- | - | - | - | +/- | +/- | -  | -  | -  | -  | +  | -  | +  |
| Huang [54]          | +    | -   | - | +/- | + | + | - | +   | +   | -  | +  | +  | +  | +  | +  | +  |
| Liao [55]           | +    | -   | - | +/- | - | + | - | +/- | +   | -  | +  | +  | +  | -  | +  | +  |
| Pugès [56]          | +    | -   | - | +/- | + | + | - | +   | +   | -  | +  | +  | +  | +  | -  | +  |
| Huang [57]          | +    | -   | - | +/- | + | + | - | +   | +   | -  | +  | -  | -  | -  | +  | +  |
| Lei [58]            | +    | -   | - | +/- | + | + | - | +   | +   | -  | +  | -  | -  | +  | +  | +  |
| Sousa [59]          | +    | -   | - | -   | + | - | - | +   | +   | -  | 0  | -  | -  | 0  | 0  | -  |
| Vollaard [60]       | -    | -   | - | -   | - | - | - | -   | +   | -  | 0  | 0  | -  | 0  | 0  | +  |
| Dos Santos [61]     | +    | -   | - | +   | + | - | - | +   | +   | -  | 0  | 0  | +  | 0  | 0  | -  |
| Lee [62]            | -    | +/- | - | +/- | + | + | - | +   | +   | -  | +  | -  | -  | -  | -  | -  |
| Subesinghe [63]     | +    | -   | - | +/- | + | + | - | +   | +   | -  | +  | +  | +  | -  | -  | -  |
| Yeh [64]            | +    | +/- | - | +/- | + | + | - | +   | +   | -  | -  | -  | -  | +  | +  | +  |
| Zimmermann [65]     | +    | -   | - | +/- | - | - | - | +   | -   | -  | 0  | 0  | -  | 0  | 0  | +  |
| Zimmermann [66]     | +    | -   | - | +/- | - | - | - | +   | -   | -  | 0  | 0  | -  | 0  | 0  | +  |
| van den Berg [67]   | +    | -   | - | +   | + | + | - | +   | +   | -  | +  | +  | +  | +  | +  | +  |

The ratings are reported as: Yes (+); Partial yes (+/-); No (-) and Not applicable (0)

**Table S3.** Pooled estimates extracted from the available meta-analyses of the effect of probiotic, prebiotic or symbiotic use in order to enhance the influenza vaccine-induced immune response (all models are random-effects).

| Study    | Supplement type    | Population         | Virus              | Parameter (ES)     | k                  | ES          | 95% CI        | P            | I <sup>2</sup> , % |
|----------|--------------------|--------------------|--------------------|--------------------|--------------------|-------------|---------------|--------------|--------------------|
| Lei [58] | Pro/<br>prebiotics | Any                | A/H1N1             | SC (OR)            | 6                  | 1.52        | 0.75, 3.09    | 0.25         | 51                 |
| Lei [58] |                    |                    |                    | SP (OR)            | 7                  | 1.83        | 1.19, 2.82    | 0.006        | 0                  |
| Yeh [64] |                    |                    |                    | Δ mean titers (MD) | 12                 | 7.14        | 2.73, 11.55   | 0.002        | 96                 |
| Lei [58] |                    | Adults             | A/H3N2             | SC (OR)            | 2                  | 0.62        | 0.18, 2.14    | 0.45         | 0                  |
| Lei [58] |                    | Elderly            |                    | SC (OR)            | 3                  | 2.93        | 1.47, 5.87    | 0.002        | 3                  |
| Lei [58] |                    | SC (OR)            |                    | 6                  | 2.54               | 0.93, 6.91  | 0.07          | 83           |                    |
| Lei [58] |                    | Any                | B                  | SP (OR)            | 7                  | 2.85        | 1.59, 5.10    | 0.0004       | 0                  |
| Yeh [64] |                    | Δ mean titers (MD) |                    | 12                 | 17.19              | 3.39, 30.99 | 0.01          | 100          |                    |
| Lei [58] |                    | SC (OR)            |                    | 2                  | 3.46               | 1.22, 9.83  | 0.02          | 0            |                    |
| Lei [58] |                    | Elderly            | A/H1N1             | SC (OR)            | 3                  | 3.68        | 1.11, 12.25   | 0.03         | 75                 |
| Lei [58] |                    | SC (OR)            |                    | 6                  | 2.11               | 1.38, 3.21  | 0.0006        | 0            |                    |
| Lei [58] |                    | SP (OR)            |                    | 7                  | 0.99               | 0.65, 1.52  | 0.97          | 0            |                    |
| Yeh [64] | Probiotics         | Any                | A/H1N1             | Δ mean titers (MD) | 12                 | 4.17        | 0.37, 7.96    | 0.03         | 94                 |
| Lei [58] |                    |                    |                    | SC (OR)            | 4                  | 1.91        | 0.68, 5.38    | 0.22         | 56                 |
| Yeh [64] |                    |                    |                    | Δ mean titers (MD) | 7                  | 4.71        | 0.53, 8.89    | 0.03         | 97                 |
| Lei [58] |                    | A/H3N2             | SC (OR)            | 4                  | 3.52               | 1.45, 8.53  | 0.005         | 63           |                    |
| Yeh [64] |                    |                    | Δ mean titers (MD) | 7                  | 16.86              | 0.87, 32.85 | 0.04          | 100          |                    |
| Yeh [64] |                    |                    | B                  | Δ mean titers (MD) | 7                  | 3.04        | -0.77, 6.85   | 0.12         | 96                 |
| Lei [58] |                    | Prebiotics         | A/H1N1             | SC (OR)            | 2                  | 0.99        | 0.54, 1.83    | 0.98         | 0                  |
| Yeh [64] |                    |                    |                    | Δ mean titers (MD) | 5                  | 35.15       | 0.31, 70.00   | 0.05         | 72                 |
| Lei [58] |                    |                    |                    | A/H3N2             | SC (OR)            | 2           | 1.31          | 0.22, 7.98   | 0.77               |
| Yeh [64] |                    |                    | Δ mean titers (MD) |                    | 5                  | 18.66       | -13.24, 50.56 | 0.25         | 69                 |
| Yeh [64] |                    |                    | B                  |                    | Δ mean titers (MD) | 5           | 20.68         | -9.07, 50.42 | 0.17               |

CI: confidence interval; ES: effect size; MD: mean difference; OR: odds ratio; SC: seroconversion rate; SP: seroprotection rate

**Table S4.** Subgroup analysis (by supplement type and age-class) of the summary evidence of the effect of probiotic, prebiotic or symbiotic use on seroconversion rates.

| Parameter               | A/H1N1                | A/H3N2            | B                  |
|-------------------------|-----------------------|-------------------|--------------------|
| <i>k</i>                | 3                     | 2                 | 3                  |
| <i>N</i>                | 71/73                 | 52/49             | 96/91              |
| <b>Probiotics</b>       | <b>OR RE (95% CI)</b> | 2.89 (1.19, 6.99) | 2.37 (0.41, 13.78) |
|                         | <b>OR FE (95% CI)</b> | 2.89 (1.19, 6.99) | 1.59 (0.71, 3.58)  |
| <i>I<sup>2</sup>, %</i> | 0                     | 50.2              | 0                  |
| <i>k</i>                | 4                     | 3                 | 3                  |
| <i>N</i>                | 132/125               | 109/104           | 96/83              |
| <b>Prebiotics</b>       | <b>OR RE (95% CI)</b> | 2.21 (0.78, 6.21) | 1.42 (0.42, 4.77)  |
|                         | <b>OR FE (95% CI)</b> | 1.58 (0.93, 2.71) | 0.95 (0.52, 1.75)  |
| <i>I<sup>2</sup>, %</i> | 56.8                  | 48.1              | 0                  |
| <i>k</i>                | 3                     | 3                 | 3                  |
| <i>N</i>                | 74/76                 | 74/76             | 74/76              |
| <b>Symbiotics</b>       | <b>OR RE (95% CI)</b> | 0.67 (0.24, 1.85) | 1.14 (0.33, 3.92)  |
|                         | <b>OR FE (95% CI)</b> | 0.73 (0.36, 1.50) | 1.06 (0.53, 2.10)  |
| <i>I<sup>2</sup>, %</i> | 45.9                  | 68.9              | 14.3               |
| <i>k</i>                | 4                     | 3                 | 3                  |
| <i>N</i>                | 89/94                 | 70/70             | 70/70              |
| <b>Adults</b>           | <b>OR RE (95% CI)</b> | 1.28 (0.61, 2.72) | 2.32 (1.07, 5.03)  |
|                         | <b>OR FE (95% CI)</b> | 1.28 (0.61, 2.72) | 2.32 (1.07, 5.03)  |
| <i>I<sup>2</sup>, %</i> | 0                     | 0                 | 0                  |
| <i>k</i>                | 6                     | 5                 | 6                  |
| <i>N</i>                | 188/180               | 165/159           | 196/180            |
| <b>Elderly</b>          | <b>OR RE (95% CI)</b> | 1.86 (0.77, 4.47) | 0.92 (0.48, 1.77)  |
|                         | <b>OR FE (95% CI)</b> | 1.47 (0.94, 2.32) | 0.86 (0.55, 1.37)  |
| <i>I<sup>2</sup>, %</i> | 65.1                  | 35.6              | 0                  |

Statistically significant estimates are evidenced *in italics*; CI: confidence interval; FE: fixed-effects model; OR: odds ratio; RE: random-effects model

**Table S5.** Subgroup analysis (by supplement type and age-class) of the summary evidence of the effect of probiotic, prebiotic or symbiotic use on seroprotection rates.

| Parameter               | A/H1N1                | A/H3N2            | B                  |
|-------------------------|-----------------------|-------------------|--------------------|
| <i>k</i>                | 5                     | 4                 | 4                  |
| <i>N</i>                | 630/644               | 611/622           | 611/620            |
| <b>Probiotics</b>       | <b>OR RE (95% CI)</b> | 1.76 (0.92, 3.37) | 1.20 (0.49, 2.94)  |
|                         | <b>OR FE (95% CI)</b> | 1.15 (0.86, 1.53) | 1.37 (0.71, 2.66)  |
| <i>I<sup>2</sup>, %</i> | 51.8                  | 34.8              | 0                  |
| <i>k</i>                | 4                     | 3                 | 3                  |
| <i>N</i>                | 132/125               | 109/104           | 104/103            |
| <b>Prebiotics</b>       | <b>OR RE (95% CI)</b> | 2.72 (1.14, 6.50) | 3.86 (1.33, 11.19) |
|                         | <b>OR FE (95% CI)</b> | 2.36 (1.36, 4.08) | 3.86 (1.33, 11.19) |
| <i>I<sup>2</sup>, %</i> | 43.1                  | 0                 | 0                  |
| <i>k</i>                | 4                     | 4                 | 4                  |
| <i>N</i>                | 83/86                 | 85/86             | 85/87              |
| <b>Symbiotics</b>       | <b>OR RE (95% CI)</b> | 0.69 (0.24, 2.00) | 2.38 (0.60, 9.44)  |
|                         | <b>OR FE (95% CI)</b> | 0.64 (0.28, 1.43) | 2.27 (0.91, 5.65)  |
| <i>I<sup>2</sup>, %</i> | 32.5                  | 54.5              | 37.6               |
| <i>k</i>                | 5                     | 4                 | 4                  |
| <i>N</i>                | 620/636               | 601/612           | 601/612            |
| <b>Adults</b>           | <b>OR RE (95% CI)</b> | 0.92 (0.68, 1.25) | 1.97 (0.79, 4.91)  |
|                         | <b>OR FE (95% CI)</b> | 0.92 (0.68, 1.25) | 1.85 (0.87, 3.94)  |
| <i>I<sup>2</sup>, %</i> | 0                     | 29.0              | 46.4               |
| <i>k</i>                | 8                     | 7                 | 7                  |
| <i>N</i>                | 225/219               | 204/200           | 199/198            |
| <b>Elderly</b>          | <b>OR RE (95% CI)</b> | 2.40 (1.25, 4.60) | 1.87 (0.78, 4.49)  |
|                         | <b>OR FE (95% CI)</b> | 2.17 (1.45, 3.26) | 2.00 (1.08, 3.71)  |
| <i>I<sup>2</sup>, %</i> | 52.7                  | 38.8              | 0                  |

Statistically significant estimates are evidenced *in italics*; CI: confidence interval; FE: fixed-effects model; OR: odds ratio; RE: random-effects model

**Table S6.** Subgroup analysis (by supplement type and age-class) of the summary evidence of the effect of probiotic, prebiotic or symbiotic use on post-vaccination hemagglutination-inhibition titers.

| <b>Parameter</b>          | <b>A/H1N1</b>       | <b>A/H3N2</b>      | <b>B</b>            |
|---------------------------|---------------------|--------------------|---------------------|
| <i>k</i>                  | 6                   | 5                  | 5                   |
| <i>N</i>                  | 233/232             | 214/208            | 214/208             |
| <b>Probiotics</b>         |                     |                    |                     |
| <i>g</i> RE (95% CI)      | 0.08 (-0.10, 0.27)  | 0.06 (-0.13, 0.26) | 0.00 (-0.19, 0.19)  |
| <i>g</i> FE (95% CI)      | 0.08 (-0.10, 0.27)  | 0.06 (-0.13, 0.26) | 0.00 (-0.19, 0.19)  |
| <i>I</i> <sup>2</sup> , % | 0                   | 0                  | 0                   |
| <i>k</i>                  | 2                   | 2                  | 2                   |
| <i>N</i>                  | 92/90               | 92/90              | 92/90               |
| <b>Prebiotics</b>         |                     |                    |                     |
| <i>g</i> RE (95% CI)      | 0.07 (-0.23, 0.36)  | 0.03 (-0.26, 0.32) | 0.04 (-0.25, 0.33)  |
| <i>g</i> FE (95% CI)      | 0.07 (-0.23, 0.36)  | 0.03 (-0.26, 0.32) | 0.04 (-0.25, 0.33)  |
| <i>I</i> <sup>2</sup> , % | 0                   | 0                  | 0                   |
| <i>k</i>                  | 3                   | 3                  | 3                   |
| <i>N</i>                  | 74/76               | 74/76              | 74/76               |
| <b>Symbiotics</b>         |                     |                    |                     |
| <i>g</i> RE (95% CI)      | -0.08 (-0.40, 0.24) | 0.01 (-0.31, 0.33) | -0.06 (-0.38, 0.26) |
| <i>g</i> FE (95% CI)      | -0.08 (-0.40, 0.24) | 0.01 (-0.31, 0.33) | -0.06 (-0.38, 0.26) |
| <i>I</i> <sup>2</sup> , % | 0                   | 0                  | 0                   |
| <i>k</i>                  | 3                   | 2                  | 2                   |
| <i>N</i>                  | 67/73               | 48/49              | 48/49               |
| <b>Adults</b>             |                     |                    |                     |
| <i>g</i> RE (95% CI)      | 0.15 (-0.19, 0.49)  | 0.08 (-0.31, 0.48) | -0.02 (-0.42, 0.37) |
| <i>g</i> FE (95% CI)      | 0.15 (-0.19, 0.48)  | 0.08 (-0.31, 0.48) | -0.02 (-0.42, 0.37) |
| <i>I</i> <sup>2</sup> , % | 3.6                 | 0                  | 0                   |
| <i>k</i>                  | 8                   | 8                  | 8                   |
| <i>N</i>                  | 332/325             | 332/325            | 332/325             |
| <b>Elderly</b>            |                     |                    |                     |
| <i>g</i> RE (95% CI)      | 0.03 (-0.12, 0.18)  | 0.04 (-0.11, 0.19) | 0.00 (-0.15, 0.15)  |
| <i>g</i> FE (95% CI)      | 0.03 (-0.12, 0.18)  | 0.08 (-0.11, 0.19) | 0.00 (-0.15, 0.15)  |
| <i>I</i> <sup>2</sup> , % | 0                   | 0                  | 0                   |

CI: confidence interval; FE: fixed-effects model; RE: random-effects model

**Table S7.** Pooled estimates extracted from the available meta-analyses [62] of the effect of vitamin D deficiency on the influenza vaccine-induced immune response (all models are random-effects).

| Parameter                  |                         | A/H1N1            | A/H3N2            | B                 |
|----------------------------|-------------------------|-------------------|-------------------|-------------------|
| <b>Seroconversion rate</b> | <i>k</i>                | 6                 | 4                 | 4                 |
|                            | <i>N</i>                | 383/1178          | 358/1079          | 358/1079          |
|                            | <b>OR (95% CI)</b>      | 1.10 (0.79, 1.54) | 0.98 (0.76, 1.25) | 0.98 (0.75, 1.27) |
|                            | <i>I<sup>2</sup>, %</i> | 25                | 0                 | 0                 |
| <b>Seroprotection rate</b> | <i>k</i>                | 6                 | 4                 | 4                 |
|                            | <i>N</i>                | 373/1144          | 358/1079          | 358/1019          |
|                            | <b>OR (95% CI)</b>      | 1.00 (0.52, 1.92) | 0.63 (0.43, 0.91) | 0.68 (0.50, 0.93) |
|                            | <i>I<sup>2</sup>, %</i> | 75                | 36                | 1                 |

Statistically significant estimates are reported *in italics*; CI: confidence interval; OR: odds ratio

**Table S8.** Pooled estimates extracted from the available meta-analyses of the effect of immunosuppressive conditions on the influenza vaccine-induced immune response.

| Study                       | Condition                            | Population | Virus   | Parameter (ES)                  | k    | Model      | ES           | 95% CI       | P      | I <sup>2</sup> , % |
|-----------------------------|--------------------------------------|------------|---------|---------------------------------|------|------------|--------------|--------------|--------|--------------------|
| Beck [42]                   | Any immuno-suppression               | Any        | A/H1N1  | SC (OR)                         | 50   | RE         | 0.55         | 0.43, 0.71   | <0.001 | 53.2               |
|                             |                                      |            | A/H3N2  |                                 | 47   | RE         | 0.55         | 0.41, 0.73   | <0.001 | 66.9               |
|                             |                                      |            | B       |                                 | 44   | RE         | 0.48         | 0.36, 0.62   | <0.001 | 54.3               |
|                             |                                      |            | A/H1N1  | SP (OR)                         | 37   | RE         | 0.36         | 0.26, 0.51   | <0.001 | 56.9               |
|                             |                                      |            | A/H3N2  |                                 | 35   | RE         | 0.39         | 0.26, 0.59   | <0.001 | 64.1               |
|                             |                                      |            | B       |                                 | 37   | RE         | 0.37         | 0.25, 0.53   | <0.001 | 65.1               |
| Beck [44]                   | HIV                                  |            | A/H1N1  | SC (OR)                         | 17   | FE         | 0.51         | 0.40, 0.66   | <0.001 | 19.5               |
|                             |                                      |            | A/H3N2  |                                 | 15   | RE         | 0.47         | 0.27, 0.79   | 0.005  | 69.4               |
|                             |                                      |            | B       |                                 | 15   | FE         | 0.34         | 0.26, 0.44   | <0.001 | 36.7               |
|                             |                                      |            | A/H1N1  | SP (OR)                         | 7    | RE         | 0.28         | 0.12, 0.65   | 0.003  | 69.8               |
|                             |                                      |            | A/H3N2  |                                 | 7    | RE         | 0.28         | 0.09, 0.80   | 0.02   | 69.7               |
|                             |                                      |            | B       |                                 | 7    | RE         | 0.24         | 0.09, 0.60   | 0.002  | 64.3               |
|                             | Cancer                               |            | A/H1N1  | SC (OR)                         | 12   | FE         | 0.31         | 0.22, 0.43   | <0.001 | 34.8               |
|                             |                                      |            | A/H3N2  |                                 | 12   | RE         | 0.39         | 0.21, 0.71   | <0.001 | 66.6               |
|                             |                                      |            | B       |                                 | 8    | RE         | 0.37         | 0.20, 0.68   | 0.001  | 46.5               |
|                             |                                      |            | A/H1N1  | SP (OR)                         | 10   | RE         | 0.30         | 0.15, 0.61   | 0.001  | 64.3               |
|                             |                                      |            | A/H3N2  |                                 | 10   | RE         | 0.30         | 0.14, 0.63   | 0.002  | 62.6               |
|                             |                                      |            | B       |                                 | 9    | RE         | 0.30         | 0.14, 0.67   | 0.003  | 68.4               |
|                             | Transplantation                      | A/H1N1     | SC (OR) | 10                              | RE   | 0.76       | 0.38, 1.51   | >0.05        | 57.8   |                    |
|                             |                                      | A/H3N2     |         | 10                              | RE   | 0.38       | 0.23, 0.62   | <0.001       | 42.8   |                    |
|                             |                                      | B          |         | 10                              | RE   | 0.48       | 0.27, 0.86   | 0.01         | 55.2   |                    |
|                             |                                      | A/H1N1     | SP (OR) | 10                              | FE   | 0.28       | 0.16, 0.47   | <0.001       | 7.3    |                    |
|                             |                                      | A/H3N2     |         | 7                               | RE   | 0.29       | 0.09, 0.92   | 0.04         | 78.4   |                    |
|                             |                                      | B          |         | 9                               | RE   | 0.36       | 0.19, 0.70   | 0.002        | 59.0   |                    |
|                             | Autoimmune diseases treated with ISs | A/H1N1     | SC (OR) | 8                               | RE   | 0.90       | 0.45, 1.80   | >0.05        | 68.8   |                    |
|                             |                                      | A/H3N2     |         | 7                               | FE   | 1.54       | 1.03, 2.32   | 0.04         | 32.1   |                    |
|                             |                                      | B          |         | 7                               | RE   | 0.98       | 0.43, 2.24   | >0.05        | 65.1   |                    |
|                             |                                      | A/H1N1     | SP (OR) | 7                               | FE   | 0.49       | 0.29, 0.84   | 0.01         | 0      |                    |
|                             |                                      | A/H3N2     |         | 9                               | FE   | 0.71       | 0.43, 1.17   | >0.05        | 3.8    |                    |
|                             |                                      | B          |         | 9                               | RE   | 0.48       | 0.22, 1.05   | >0.05        | 65.9   |                    |
| Respiratory diseases on ISs | A/H1N1                               | SC (OR)    | 2       | RE                              | 0.96 | 0.33, 2.79 | >0.05        | 46.3         |        |                    |
|                             | A/H3N2                               |            | 2       | RE                              | 0.93 | 0.30, 2.85 | >0.05        | 53.3         |        |                    |
|                             | B                                    |            | 2       | FE                              | 0.29 | 0.14, 0.59 | 0.001        | 23.6         |        |                    |
| Eckerle [45]                | Solid organ transplantation (any)    | Any        | A/H1N1  | Response rate (RD) <sup>†</sup> | 19   | FE         | -0.12        | -0.16, -0.08 | <0.05  | 88.0               |
|                             |                                      |            | A/H3N2  |                                 | 19   | RE         | -0.16        | -0.25, -0.06 | <0.05  |                    |
|                             |                                      |            | A/H3N2  |                                 | 18   | FE         | -0.15        | -0.19, -0.11 | <0.05  | 79.2               |
|                             |                                      |            | B       |                                 | 18   | RE         | -0.15        | -0.23, -0.07 | <0.05  |                    |
|                             |                                      |            | B       |                                 | 19   | FE         | -0.12        | -0.16, -0.07 | <0.05  | 83.7               |
|                             |                                      |            | A/H1N1  |                                 | 19   | RE         | -0.10        | -0.19, -0.01 | <0.05  |                    |
|                             | Renal transplantation                |            | A/H1N1  |                                 | 9    | FE         | -0.12        | -0.19, -0.06 | <0.05  | 87.3               |
|                             |                                      |            | A/H3N2  |                                 | 9    | RE         | -0.15        | -0.32, 0.02  | >0.05  |                    |
|                             |                                      |            | A/H3N2  |                                 | 9    | FE         | -0.15        | -0.22, -0.09 | <0.05  | 53.7               |
|                             |                                      |            | B       |                                 | 9    | RE         | -0.13        | -0.22, -0.04 | <0.05  |                    |
|                             |                                      |            | B       |                                 | 9    | FE         | 0.03         | -0.03, 0.09  | >0.05  | 57.1               |
|                             |                                      |            | B       |                                 | 9    | RE         | 0.00         | -0.09, 0.09  | >0.05  |                    |
|                             | Liver transplantation                |            | A/H1N1  |                                 | 5    | FE         | -0.07        | -0.14, 0.01  | >0.05  | 0                  |
|                             |                                      |            | A/H3N2  |                                 | 5    | RE         | -0.07        | -0.13, -0.01 | <0.05  |                    |
|                             |                                      |            | A/H3N2  |                                 | 5    | FE         | -0.06        | -0.13, 0.00  | 0.05   | 83.1               |
|                             |                                      |            | B       |                                 | 5    | RE         | -0.10        | -0.25, 0.06  | >0.05  |                    |
|                             |                                      |            | B       |                                 | 5    | FE         | -0.03        | -0.10, 0.04  | >0.05  | 13.7               |
|                             |                                      |            | B       |                                 | 5    | RE         | -0.04        | -0.12, 0.03  | >0.05  |                    |
|                             | Heart transplantation                | A/H1N1     | 3       |                                 | FE   | -0.06      | -0.14, -0.01 | <0.05        | 94.9   |                    |
|                             |                                      | A/H3N2     | 3       |                                 | RE   | -0.19      | -0.75, 0.37  | >0.05        |        |                    |
|                             |                                      | A/H3N2     | 2       |                                 | FE   | -0.27      | -0.37, -0.17 | <0.05        | 0      |                    |
|                             |                                      | B          | 2       |                                 | RE   | -0.27      | -0.37, -0.17 | <0.05        |        |                    |
|                             |                                      | B          | 3       |                                 | FE   | -0.46      | -0.57, -0.35 | <0.05        | 48.1   |                    |
|                             |                                      | B          | 3       |                                 | RE   | -0.41      | -0.59, -0.23 | <0.05        |        |                    |



|                 |                             |         |        |          |        |         |      |            |          |            |          |    |
|-----------------|-----------------------------|---------|--------|----------|--------|---------|------|------------|----------|------------|----------|----|
| Hua [47]        | RA patients on methotrexate | Adults  | A/H1N1 | ARR (OR) | 2      | FE      | 1.36 | 0.69, 2.68 | 0.37     | 0          |          |    |
|                 |                             |         | A/H3N2 |          | 2      | FE      | 1.33 | 0.70, 2.53 | 0.39     | 0          |          |    |
|                 |                             |         | B      |          | 2      | FE      | 1.28 | 0.64, 2.56 | 0.48     | 0          |          |    |
|                 | RA patients on rituximab    |         | A/H1N1 |          | 2      | FE      | 0.44 | 0.17, 1.12 | 0.08     | 56         |          |    |
|                 |                             |         | A/H3N2 |          | 2      | FE      | 0.11 | 0.04, 0.31 | <0.0001  | 0          |          |    |
|                 |                             |         | B      |          | 2      | FE      | 0.29 | 0.10, 0.81 | 0.02     | 37         |          |    |
|                 | RA patients on $\alpha$ TNF |         | A/H1N1 |          | 4      | RE      | 0.93 | 0.36, 2.37 | 0.88     | 74         |          |    |
|                 |                             |         | A/H3N2 |          | 4      | RE      | 0.79 | 0.34, 1.83 | 0.59     | 68         |          |    |
|                 |                             |         | B      |          | 4      | RE      | 0.79 | 0.37, 1.70 | 0.55     | 57         |          |    |
| Huang [54]      | SLE                         | Any     | A/H1N1 | SC (RR)  | 13     | RE      | 0.71 | 0.62, 0.81 | <0.00001 | 56         |          |    |
|                 |                             |         | A/H3N2 |          | 7      | RE      | 0.73 | 0.53, 1.01 | 0.06     | 72         |          |    |
|                 |                             |         | B      |          | 4      | RE      | 0.66 | 0.52, 0.82 | 0.0003   | 0          |          |    |
|                 |                             |         | A/H1N1 | SP (RR)  | 12     | RE      | 0.79 | 0.73, 0.87 | <0.00001 | 46         |          |    |
|                 |                             |         | A/H3N2 |          | 6      | RE      | 0.84 | 0.68, 1.03 | 0.09     | 68         |          |    |
|                 |                             |         | B      |          | 5      | RE      | 0.75 | 0.65, 0.87 | 0.0002   | 0          |          |    |
| Liao [55]       |                             |         | SLE    | Any      | A/H1N1 | SC (OR) | 15   | RE         | 0.39     | 0.27, 0.57 | <0.00001 | 65 |
|                 |                             |         |        |          | A/H3N2 |         | 6    | RE         | 0.62     | 0.21, 1.79 | 0.37     | 77 |
|                 |                             |         |        |          | B      |         | 6    | FE         | 0.47     | 0.29, 0.76 | 0.002    | 0  |
|                 | A/H1N1                      | SP (OR) |        |          | 18     | RE      | 0.36 | 0.27, 0.50 | <0.00001 | 35         |          |    |
|                 | A/H3N2                      |         |        |          | 8      | RE      | 0.48 | 0.24, 0.93 | 0.03     | 33         |          |    |
|                 | B                           |         |        |          | 6      | RE      | 0.55 | 0.24, 1.25 | 0.16     | 42         |          |    |
| Pugès [56]      | SLE                         | Any     |        |          | A/H1N1 | SC (OR) | 12   | RE         | 0.38     | 0.27, 0.54 | <0.00001 | 39 |
|                 |                             |         |        |          | A/H3N2 |         | 11   | RE         | 0.66     | 0.36, 1.23 | 0.19     | 61 |
|                 |                             |         |        |          | B      |         | 5    | RE         | 0.51     | 0.20, 1.28 | 0.15     | 66 |
|                 |                             |         | A/H1N1 | SP (OR)  | 11     | RE      | 0.36 | 0.28, 0.47 | <0.00001 | 25         |          |    |
|                 |                             |         | A/H3N2 |          | 6      | FE      | 0.26 | 0.14, 0.50 | <0.0001  | 21         |          |    |
|                 |                             |         | B      |          | 5      | RE      | 0.93 | 0.42, 2.08 | 0.86     | 56         |          |    |
| Huang [57]      |                             |         | RA     | Adults   | A/H1N1 | SC (RR) | 12   | RE         | 0.78     | 0.68, 0.90 | 0.0004   | 43 |
|                 |                             |         |        |          | A/H3N2 |         | 8    | RE         | 1.11     | 0.93, 1.32 | 0.24     | 14 |
|                 |                             |         |        |          | B      |         | 9    | RE         | 0.84     | 0.62, 1.14 | 0.27     | 47 |
|                 | A/H1N1                      | SP (RR) |        |          | 9      | RE      | 0.72 | 0.60, 0.86 | 0.0005   | 89         |          |    |
|                 | A/H3N2                      |         |        |          | 5      | RE      | 0.96 | 0.82, 1.13 | 0.64     | 26         |          |    |
|                 | B                           |         |        |          | 5      | RE      | 0.95 | 0.84, 1.08 | 0.44     | 28         |          |    |
| Subesinghe [63] | RA patients on methotrexate | Adults  |        |          | A/H1N1 | SP (RR) | 5    | RE         | 0.88     | 0.69, 1.11 | 0.27     | 81 |
|                 |                             |         |        |          | A/H3N2 |         | 2    | RE         | 0.94     | 0.85, 1.04 | 0.22     | 0  |
|                 |                             |         |        |          | B      |         | 2    | RE         | 1.15     | 0.63, 2.10 | 0.64     | 92 |
|                 | RA patients on $\alpha$ TNF |         | A/H1N1 | SP (RR)  | 7      | RE      | 0.86 | 0.72, 1.04 | 0.12     | 70         |          |    |
|                 |                             |         | A/H3N2 |          | 4      | RE      | 0.98 | 0.74, 1.31 | 0.89     | 65         |          |    |
|                 |                             |         | B      |          | 4      | RE      | 1.38 | 0.70, 2.72 | 0.35     | 91         |          |    |

\*Seroconversion and seroprotection rates were probably pooled together; ARR: absolute risk reduction; CI: confidence interval; ES: effect size; FE: fixed-effects model; HIV: human immunodeficiency virus; IS: immunosuppressant; OR: odds ratio; RCT: randomized controlled trial; RA: rheumatoid arthritis; RE: random-effects model; RR: risk ratio; SC: seroconversion rate; SLE: systemic lupus erythematosus; SP: seroprotection rate; TNF: tumor necrosis factor

**Table S9.** Sensitivity analysis (on excluding studies with imputed standard deviations) on the effect of any immunosuppressive condition on post-vaccination hemagglutination-inhibition titers.

| Parameter            | A/H1N1               | A/H3N2               | B                    |
|----------------------|----------------------|----------------------|----------------------|
| <i>k</i>             | 52                   | 35                   | 35                   |
| <i>N</i>             | 5616/2425            | 2116/1174            | 2198/1234            |
| <b>g RE (95% CI)</b> | -0.34 (-0.45, -0.23) | -0.53 (-0.68, -0.39) | -0.36 (-0.50, -0.21) |
| <i>P RE</i>          | 9·10 <sup>-10</sup>  | 3·10 <sup>-13</sup>  | 1·10 <sup>-6</sup>   |
| <b>95% PI</b>        | -0.98, 0.30          | -1.23, 0.16          | -1.05, 0.34          |
| <b>g FE (95% CI)</b> | -0.29 (-0.34, -0.24) | -0.51 (-0.58, -0.43) | -0.30 (-0.38, -0.23) |
| <i>P FE</i>          | <1·10 <sup>-15</sup> | <1·10 <sup>-15</sup> | 3·10 <sup>-15</sup>  |
| <i>P</i> , %         | 73.9                 | 68.6                 | 69.7                 |
| $\tau^2$             | 0.10                 | 0.12                 | 0.12                 |
| <b>SSE, <i>P</i></b> | 0.11                 | 0.25                 | 0.062                |
| <b>LS</b>            | Yes                  | Yes                  | No                   |
| <b>CES</b>           | II                   | II                   | III                  |

CES: cumulative evidence synthesis class; CI: confidence interval; FE: fixed-effects model; LS: the largest study has a statistically significant effect size; PI: prediction interval; RE: random-effects model; SSE: small-study effect test

**Table S10.** Multivariable meta-regression analysis in order to predict the observed pooled estimates of seroconversion rates.

| Parameter                  | Variable        | Univariable model |          | Full model    |          |
|----------------------------|-----------------|-------------------|----------|---------------|----------|
|                            |                 | <i>b</i> (SE)     | <i>P</i> | <i>b</i> (SE) | <i>P</i> |
| Publication in year        | <2000           | Ref               | –        | Ref           | –        |
|                            | ≥2000           | 0.06 (0.13)       | 0.64     | 0.03 (0.13)   | 0.84     |
| Total sample size          | <100            | Ref               | –        | Ref           | –        |
|                            | ≥100            | 0.14 (0.11)       | 0.21     | 0.14 (0.12)   | 0.25     |
| Age                        | Children        | Ref               | –        | Ref           | –        |
|                            | Adults          | -0.02 (0.14)      | 0.86     | -0.11 (0.14)  | 0.44     |
| Virus                      | A/H1N1          | Ref               | –        | Ref           | –        |
|                            | A/H3N2          | 0.03 (0.13)       | 0.82     | 0.08 (0.13)   | 0.56     |
|                            | B               | 0.07 (0.14)       | 0.62     | 0.11 (0.14)   | 0.42     |
| Immunosuppression category | Transplantation | Ref               | –        | Ref           | –        |
|                            | Cancer          | -0.27 (0.17)      | 0.12     | -0.26 (0.18)  | 0.14     |
|                            | HIV             | -0.05 (0.17)      | 0.79     | -0.07 (0.18)  | 0.69     |
|                            | RDs             | 0.28 (0.15)       | 0.070    | 0.27 (0.16)   | 0.091    |
|                            | Other/Mixed     | -0.11 (0.19)      | 0.57     | -0.17 (0.20)  | 0.41     |

HIV: human immunodeficiency virus; RD: rheumatic disease; SE: standard error

**Table S11.** Multivariable meta-regression analysis in order to predict the observed pooled estimates of seroprotection rates.

| Parameter                  | Variable        | Univariable model |          | Full model    |          |
|----------------------------|-----------------|-------------------|----------|---------------|----------|
|                            |                 | <i>b</i> (SE)     | <i>P</i> | <i>b</i> (SE) | <i>P</i> |
| Publication in year        | <2000           | Ref               | –        | Ref           | –        |
|                            | ≥2000           | 0.32 (0.18)       | 0.076    | 0.13 (0.20)   | 0.50     |
| Total sample size          | <100            | Ref               | –        | Ref           | –        |
|                            | ≥100            | -0.02 (0.14)      | 0.88     | 0.03 (0.15)   | 0.85     |
| Age                        | Children        | Ref               | –        | Ref           | –        |
|                            | Adults          | -0.17 (0.18)      | 0.35     | -0.18 (0.18)  | 0.32     |
| Virus                      | A/H1N1          | Ref               | –        | Ref           | –        |
|                            | A/H3N2          | -0.19 (0.17)      | 0.26     | -0.14 (0.17)  | 0.39     |
|                            | B               | 0.23 (0.16)       | 0.16     | 0.26 (0.16)   | 0.11     |
| Immunosuppression category | Transplantation | Ref               | –        | Ref           | –        |
|                            | Cancer          | 0.27 (0.23)       | 0.23     | 0.24 (0.24)   | 0.31     |
|                            | HIV             | -0.11 (0.25)      | 0.66     | -0.13 (0.25)  | 0.62     |
|                            | RDs             | 0.42 (0.19)       | 0.026    | 0.39 (0.20)   | 0.051    |
|                            | Other/Mixed     | 0.35 (0.24)       | 0.14     | 0.26 (0.26)   | 0.31     |

HIV: human immunodeficiency virus; RD: rheumatic disease; SE: standard error

**Table S12.** Multivariable meta-regression analysis in order to predict the observed pooled estimates of post-vaccination hemagglutination-inhibition titers.

| Parameter                  | Variable        | Univariable model |          | Full model    |          |
|----------------------------|-----------------|-------------------|----------|---------------|----------|
|                            |                 | <i>b</i> (SE)     | <i>P</i> | <i>b</i> (SE) | <i>P</i> |
| Publication in year        | <2000           | Ref               | –        | Ref           | –        |
|                            | ≥2000           | 0.16 (0.07)       | 0.016    | 0.06 (0.07)   | 0.38     |
| Total sample size          | <100            | Ref               | –        | Ref           | –        |
|                            | ≥100            | 0.05 (0.06)       | 0.42     | 0.04 (0.06)   | 0.51     |
| Age                        | Children        | Ref               | –        | Ref           | –        |
|                            | Adults          | 0.01 (0.07)       | 0.85     | 0.00 (0.07)   | 0.99     |
| Virus                      | A/H1N1          | Ref               | –        | Ref           | –        |
|                            | A/H3N2          | -0.08 (0.07)      | 0.80     | -0.05 (0.06)  | 0.39     |
|                            | B               | 0.02 (0.07)       | 0.80     | 0.05 (0.07)   | 0.45     |
| Immunosuppression category | Transplantation | Ref               | –        | Ref           | –        |
|                            | Cancer          | 0.14 (0.10)       | 0.13     | 0.14 (0.10)   | 0.18     |
|                            | HIV             | 0.01 (0.10)       | 0.89     | 0.01 (0.10)   | 0.92     |
|                            | RDs             | 0.41 (0.08)       | <0.0001  | 0.40 (0.09)   | <0.0001  |
|                            | Other/Mixed     | 0.22 (0.10)       | 0.32     | 0.20 (0.10)   | 0.060    |

HIV: human immunodeficiency virus; RD: rheumatic disease; SE: standard error

**Table S13.** Summary evidence of the effect of rheumatic diseases on the influenza vaccine-induced immune response, by immunogenicity parameter and viral (sub)type.

| Parameter                                                 | A/H1N1               | A/H3N2               | B                   |
|-----------------------------------------------------------|----------------------|----------------------|---------------------|
| <b>Seroconversion rate</b>                                |                      |                      |                     |
| <i>k</i>                                                  | 38                   | 26                   | 21                  |
| <i>N</i>                                                  | 4676/1825            | 1245/657             | 1091/568            |
| <b>OR RE (95% CI)</b>                                     | 0.57 (0.43, 0.76)    | 0.78 (0.56, 1.10)    | 0.76 (0.54, 1.06)   |
| <i>P</i> RE                                               | 0.0001               | 0.16                 | 0.11                |
| <b>95% PI</b>                                             | 0.15, 2.22           | 0.22, 2.81           | 0.26, 2.18          |
| <b>OR FE (95% CI)</b>                                     | 0.57 (0.49, 0.65)    | 0.83 (0.67, 1.03)    | 0.75 (0.59, 0.95)   |
| <i>P</i> FE                                               | <1·10 <sup>-15</sup> | 0.090                | 0.016               |
| <i>I</i> <sup>2</sup> , %                                 | 69.8                 | 54.6                 | 45.5                |
| $\tau^2$                                                  | 0.46                 | 0.39                 | 0.26                |
| <b>SSE, <i>P</i></b>                                      | 0.75                 | 0.83                 | 0.46                |
| <b>LS</b>                                                 | Yes                  | No                   | Yes                 |
| <b>CES</b>                                                | III                  | ns                   | IV                  |
| <b>Seroprotection rate</b>                                |                      |                      |                     |
| <i>k</i>                                                  | 42                   | 28                   | 27                  |
| <i>N</i>                                                  | 5108/1971            | 1618/770             | 1563/707            |
| <b>OR RE (95% CI)</b>                                     | 0.47 (0.36, 0.60)    | 0.41 (0.28, 0.61)    | 0.76 (0.47, 1.25)   |
| <i>P</i> RE                                               | 3·10 <sup>-9</sup>   | 0.00001              | 0.28                |
| <b>95% PI</b>                                             | 0.19, 1.16           | 0.13, 1.31           | 0.11, 5.52          |
| <b>OR FE (95% CI)</b>                                     | 0.47 (0.40, 0.56)    | 0.40 (0.30, 0.55)    | 0.84 (0.64, 1.11)   |
| <i>P</i> FE                                               | <1·10 <sup>-15</sup> | 8·10 <sup>-9</sup>   | 0.22                |
| <i>I</i> <sup>2</sup> , %                                 | 38.7                 | 30.3                 | 64.1                |
| $\tau^2$                                                  | 0.20                 | 0.31                 | 0.96                |
| <b>SSE, <i>P</i></b>                                      | 0.96                 | 0.17                 | 0.31                |
| <b>LS</b>                                                 | Yes                  | Yes                  | Yes                 |
| <b>CES</b>                                                | II                   | II                   | ns                  |
| <b>Post-vaccination hemagglutination-inhibition titer</b> |                      |                      |                     |
| <i>k</i>                                                  | 38                   | 27                   | 22                  |
| <i>N</i>                                                  | 4479/1810            | 1591/833             | 1415/668            |
| <b>g RE (95% CI)</b>                                      | -0.21 (-0.30, -0.11) | -0.26 (-0.39, -0.12) | -0.05 (-0.21, 0.10) |
| <i>P</i> RE                                               | 0.00002              | 0.0003               | 0.50                |
| <b>95% PI</b>                                             | -0.63, 0.21          | -0.80, 0.29          | -0.61, 0.51         |
| <b>g FE (95% CI)</b>                                      | -0.23 (-0.29, -0.17) | -0.28 (-0.37, -0.19) | -0.05 (-0.15, 0.05) |
| <i>P</i> FE                                               | 6·10 <sup>-15</sup>  | 6·10 <sup>-10</sup>  | 0.31                |
| <i>I</i> <sup>2</sup> , %                                 | 55.5                 | 57.0                 | 58.5                |
| $\tau^2$                                                  | 0.04                 | 0.07                 | 0.08                |
| <b>SSE, <i>P</i></b>                                      | 0.29                 | 0.26                 | 0.85                |
| <b>LS</b>                                                 | Yes                  | No                   | Yes                 |
| <b>CES</b>                                                | III                  | III                  | ns                  |

CES: cumulative evidence synthesis class; CI: confidence interval; FE: fixed-effects model; LS: the largest study has a statistically significant effect size; OR: odds ratio; PI: prediction interval; RE: random-effects model; SSE: small-study effect test

**Table S14.** Summary evidence of the effect of rheumatoid arthritis on the influenza vaccine-induced immune response, by immunogenicity parameter and viral (sub)type.

| Parameter                                                 | A/H1N1               | A/H3N2                | B                   |
|-----------------------------------------------------------|----------------------|-----------------------|---------------------|
| <b>Seroconversion rate</b>                                |                      |                       |                     |
| <i>k</i>                                                  | 16                   | 12                    | 11                  |
| <i>N</i>                                                  | 1030/719             | 517/303               | 502/273             |
| <b>OR RE (95% CI)</b>                                     | 0.64 (0.45, 0.91)    | 0.93 (0.62, 1.40)     | 0.75 (0.45, 1.26)   |
| <i>P</i> RE                                               | 0.014                | 0.73                  | 0.27                |
| <b>95% PI</b>                                             | 0.23, 1.80           | 0.39, 2.25            | 0.22, 2.55          |
| <b>OR FE (95% CI)</b>                                     | 0.55 (0.45, 0.68)    | 0.97 (0.71, 1.32)     | 0.72 (0.51, 1.01)   |
| <i>P</i> FE                                               | 8·10 <sup>-8</sup>   | 0.84                  | 0.060               |
| <i>I</i> <sup>2</sup> , %                                 | 53.8                 | 33.7                  | 47.0                |
| $\tau^2$                                                  | 0.24                 | 0.16                  | 0.32                |
| <i>SSE, P</i>                                             | 0.13                 | 0.49                  | 0.63                |
| <b>LS</b>                                                 | Yes                  | No                    | Yes                 |
| <b>CES</b>                                                | IV                   | ns                    | ns                  |
| <b>Seroprotection rate</b>                                |                      |                       |                     |
| <i>k</i>                                                  | 19                   | 15                    | 15                  |
| <i>N</i>                                                  | 1330/827             | 816/412               | 815/403             |
| <b>OR RE (95% CI)</b>                                     | 0.37 (0.23, 0.53)    | 0.36 (0.20, 0.63)     | 0.84 (0.40, 1.79)   |
| <i>P</i> RE                                               | 0.00001              | 0.0004                | 0.65                |
| <b>95% PI</b>                                             | 0.11, 1.26           | 0.09, 1.48            | 0.08, 8.96          |
| <b>OR FE (95% CI)</b>                                     | 0.39 (0.20, 0.51)    | 0.37 (0.25, 0.55)     | 0.95 (0.64, 1.41)   |
| <i>P</i> FE                                               | 9·10 <sup>-13</sup>  | 9.96·10 <sup>-7</sup> | 0.81                |
| <i>I</i> <sup>2</sup> , %                                 | 47.0                 | 39.8                  | 67.7                |
| $\tau^2$                                                  | 0.35                 | 0.44                  | 1.31                |
| <i>SSE, P</i>                                             | 0.74                 | 0.60                  | 0.53                |
| <b>LS</b>                                                 | Yes                  | Yes                   | Yes                 |
| <b>CES</b>                                                | II                   | IV                    | ns                  |
| <b>Post-vaccination hemagglutination-inhibition titer</b> |                      |                       |                     |
| <i>k</i>                                                  | 15                   | 13                    | 12                  |
| <i>N</i>                                                  | 1283/832             | 769/417               | 753/378             |
| <b>g RE (95% CI)</b>                                      | -0.34 (-0.47, -0.21) | -0.27 (-0.42, -0.11)  | -0.11 (-0.32, 0.10) |
| <i>P</i> RE                                               | 3·10 <sup>-7</sup>   | 0.0009                | 0.31                |
| <b>95% PI</b>                                             | -0.37, -0.04         | -0.60, 0.07           | -0.69, 0.47         |
| <b>g FE (95% CI)</b>                                      | -0.37 (-0.47, -0.27) | -0.26 (-0.38, -0.13)  | -0.10 (-0.23, 0.03) |
| <i>P</i> FE                                               | 1·10 <sup>-13</sup>  | 0.00008               | 0.14                |
| <i>I</i> <sup>2</sup> , %                                 | 30.8                 | 29.3                  | 58.1                |
| $\tau^2$                                                  | 0.02                 | 0.02                  | 0.08                |
| <i>SSE, P</i>                                             | 0.22                 | 0.62                  | 0.71                |
| <b>LS</b>                                                 | Yes                  | No                    | No                  |
| <b>CES</b>                                                | I                    | IV                    | ns                  |

CES: cumulative evidence synthesis class; CI: confidence interval; FE: fixed-effects model; LS: the largest study has a statistically significant effect size; OR: odds ratio; PI: prediction interval; RE: random-effects model; SSE: small-study effect test

**Table S15.** Summary evidence of the effect of systemic lupus erythematosus on the influenza vaccine-induced immune response, by immunogenicity parameter and viral (sub)type.

| Parameter                                                 | A/H1N1               | A/H3N2               | B                 |
|-----------------------------------------------------------|----------------------|----------------------|-------------------|
| <b>Seroconversion rate</b>                                |                      |                      |                   |
| <i>k</i>                                                  | 17                   | 10                   | 5                 |
| <i>N</i>                                                  | 1767/924             | 344/251              | 231/129           |
| <b>OR RE (95% CI)</b>                                     | 0.35 (0.23, 0.53)    | 0.55 (0.27, 1.12)    | 0.57 (0.35, 0.93) |
| <i>P</i> RE                                               | 9·10 <sup>-7</sup>   | 0.10                 | 0.025             |
| <b>95% PI</b>                                             | 0.10, 1.29           | 0.08, 3.67           | 0.35, 0.93        |
| <b>OR FE (95% CI)</b>                                     | 0.38 (0.31, 0.46)    | 0.50 (0.34, 0.75)    | 0.57 (0.35, 0.93) |
| <i>P</i> FE                                               | <1·10 <sup>-15</sup> | 0.0008               | 0.025             |
| <i>I</i> <sub>2</sub> , %                                 | 68.8                 | 65.2                 | 0                 |
| $\tau^2$                                                  | 0.40                 | 0.80                 | 0                 |
| <b>SSE, <i>P</i></b>                                      | 0.79                 | 0.14                 | NA                |
| <b>LS</b>                                                 | Yes                  | Yes                  | No                |
| <b>CES</b>                                                | II                   | ns                   | IV                |
| <b>Seroprotection rate</b>                                |                      |                      |                   |
| <i>k</i>                                                  | 16                   | 7                    | 6                 |
| <i>N</i>                                                  | 1784/945             | 303/201              | 249/147           |
| <b>OR RE (95% CI)</b>                                     | 0.38 (0.27, 0.54)    | 0.40 (0.21, 0.76)    | 0.52 (0.25, 1.09) |
| <i>P</i> RE                                               | 2·10 <sup>-8</sup>   | 0.0054               | 0.083             |
| <b>95% PI</b>                                             | 0.17, 0.85           | 0.14, 1.12           | 0.12, 2.21        |
| <b>OR FE (95% CI)</b>                                     | 0.38 (0.30, 0.47)    | 0.39 (0.23, 0.68)    | 0.60 (0.36, 0.99) |
| <i>P</i> FE                                               | <1·10 <sup>-15</sup> | 0.0008               | 0.045             |
| <i>I</i> <sub>2</sub> , %                                 | 36.3                 | 22.8                 | 49.3              |
| $\tau^2$                                                  | 0.14                 | 0.17                 | 0.40              |
| <b>SSE, <i>P</i></b>                                      | 0.75                 | NA                   | NA                |
| <b>LS</b>                                                 | Yes                  | Yes                  | Yes               |
| <b>CES</b>                                                | I                    | IV                   | IV                |
| <b>Post-vaccination hemagglutination-inhibition titer</b> |                      |                      |                   |
| <i>k</i>                                                  | 13                   | 9                    | NA                |
| <i>N</i>                                                  | 1181/758             | 323/258              | NA                |
| <b><i>g</i> RE (95% CI)</b>                               | -0.42 (-0.59, 0.25)  | -0.23 (-0.48, 0.03)  | NA                |
| <i>P</i> RE                                               | 1·10 <sup>-6</sup>   | 0.082                | NA                |
| <b>95% PI</b>                                             | -0.88, 0.04          | -0.82, 0.37          | NA                |
| <b><i>g</i> FE (95% CI)</b>                               | -0.47 (-0.56, -0.37) | -0.26 (-0.43, -0.09) | NA                |
| <i>P</i> FE                                               | <1·10 <sup>-15</sup> | 0.0026               | NA                |
| <i>I</i> <sub>2</sub> , %                                 | 56.7                 | 52.0                 | NA                |
| $\tau^2$                                                  | 0.05                 | 0.08                 | NA                |
| <b>SSE, <i>P</i></b>                                      | 0.87                 | NA                   | NA                |
| <b>LS</b>                                                 | Yes                  | Yes                  | NA                |
| <b>CES</b>                                                | III                  | ns                   | NA                |

CES: cumulative evidence synthesis class; CI: confidence interval; FE: fixed-effects model; LS: the largest study has a statistically significant effect size; OR: odds ratio; PI: prediction interval; RE: random-effects model; SSE: small-study effect test



**Table S16.** Summary evidence of the effect of inflammatory bowel disease on the influenza vaccine-induced immune response, by immunogenicity parameter and viral (sub)type.

| Parameter                                                 | A/H1N1              | A/H3N2            | B                  |
|-----------------------------------------------------------|---------------------|-------------------|--------------------|
| <b>Seroconversion rate</b>                                |                     |                   |                    |
| <i>k</i>                                                  | 2                   | NA                | NA                 |
| <i>N</i>                                                  | 154/65              | NA                | NA                 |
| <b>OR RE (95% CI)</b>                                     | 0.54 (0.15, 1.96)   | NA                | NA                 |
| <i>P</i> RE                                               | 0.35                | NA                | NA                 |
| <b>95% PI</b>                                             | 0.07, 4.08          | NA                | NA                 |
| <b>OR FE (95% CI)</b>                                     | 0.50 (0.26, 0.98)   | NA                | NA                 |
| <i>P</i> FE                                               | 0.043               | NA                | NA                 |
| <i>I</i> <sup>2</sup> , %                                 | 73.0                | NA                | NA                 |
| $\tau^2$                                                  | 0.63                | NA                | NA                 |
| <i>SSE, P</i>                                             | NA                  | NA                | NA                 |
| <b>LS</b>                                                 | Yes                 | NA                | NA                 |
| <b>CES</b>                                                | ns                  | NA                | NA                 |
| <b>Seroprotection rate</b>                                |                     |                   |                    |
| <i>k</i>                                                  | 5                   | 3                 | 3                  |
| <i>N</i>                                                  | 309/104             | 108/45            | 108/45             |
| <b>OR RE (95% CI)</b>                                     | 0.80 (0.35, 1.86)   | 0.74 (0.23, 2.39) | 1.12 (0.07, 17.76) |
| <i>P</i> RE                                               | 0.61                | 0.61              | 0.94               |
| <b>95% PI</b>                                             | 0.18, 3.46          | 0.23, 2.39        | 0.01, 120.4        |
| <b>OR FE (95% CI)</b>                                     | 0.80 (0.45, 1.41)   | 0.74 (0.23, 2.39) | 0.28 (0.10, 0.78)  |
| <i>P</i> FE                                               | 0.44                | 0.61              | 0.015              |
| <i>I</i> <sup>2</sup> , %                                 | 43.7                | 0                 | 61.5               |
| $\tau^2$                                                  | 0.37                | 0                 | 3.7                |
| <i>SSE, P</i>                                             | NA                  | NA                | NA                 |
| <b>LS</b>                                                 | No                  | No                | Yes                |
| <b>CES</b>                                                | ns                  | ns                | ns                 |
| <b>Post-vaccination hemagglutination-inhibition titer</b> |                     |                   |                    |
| <i>k</i>                                                  | 2                   | NA                | NA                 |
| <i>N</i>                                                  | 201/59              | NA                | NA                 |
| <b>g RE (95% CI)</b>                                      | -0.30 (-0.59, 0.00) | NA                | NA                 |
| <i>P</i> RE                                               | 0.043               | NA                | NA                 |
| <b>95% PI</b>                                             | -0.59, 0.00         | NA                | NA                 |
| <b>g FE (95% CI)</b>                                      | -0.30 (-0.59, 0.00) | NA                | NA                 |
| <i>P</i> FE                                               | 0.043               | NA                | NA                 |
| <i>I</i> <sup>2</sup> , %                                 | 0                   | NA                | NA                 |
| $\tau^2$                                                  | 0                   | NA                | NA                 |
| <i>SSE, P</i>                                             | NA                  | NA                | NA                 |
| <b>LS</b>                                                 | No                  | NA                | NA                 |
| <b>CES</b>                                                | IV                  | NA                | NA                 |

CES: cumulative evidence synthesis class; CI: confidence interval; FE: fixed-effects model; LS: the largest study has a statistically significant effect size; OR: odds ratio; PI: prediction interval; RE: random-effects model; SSE: small-study effect test

**Table S17.** Summary evidence of the effect of human immunodeficiency virus (HIV) infection on the influenza vaccine-induced immune response, by immunogenicity parameter and viral (sub)type.

| Parameter                                                 | A/H1N1               | A/H3N2               | B                    |
|-----------------------------------------------------------|----------------------|----------------------|----------------------|
| <b>Seroconversion rate</b>                                |                      |                      |                      |
| <i>k</i>                                                  | 20                   | 17                   | 15                   |
| <i>N</i>                                                  | 828/1059             | 594/803              | 558/742              |
| <b>OR RE (95% CI)</b>                                     | 0.51 (0.35, 0.74)    | 0.46 (0.26, 0.82)    | 0.40 (0.29, 0.57)    |
| <i>P</i> RE                                               | 0.0005               | 0.0082               | 2·10 <sup>-7</sup>   |
| <b>95% PI</b>                                             | 0.14, 1.81           | 0.06, 3.41           | 0.18, 0.88           |
| <b>OR FE (95% CI)</b>                                     | 0.54 (0.43, 0.67)    | 0.50 (0.38, 0.64)    | 0.37 (0.29, 0.49)    |
| <i>P</i> FE                                               | 4·10 <sup>-8</sup>   | 1·10 <sup>-7</sup>   | 2·10 <sup>-13</sup>  |
| <i>I</i> <sup>2</sup> , %                                 | 59.4                 | 75.2                 | 30.4                 |
| $\tau^2$                                                  | 0.38                 | 0.95                 | 0.13                 |
| <i>SSE, P</i>                                             | 0.47                 | 0.93                 | 0.22                 |
| <b>LS</b>                                                 | Yes                  | Yes                  | Yes                  |
| <b>CES</b>                                                | IV                   | IV                   | IV                   |
| <b>Seroprotection rate</b>                                |                      |                      |                      |
| <i>k</i>                                                  | 14                   | 11                   | 9                    |
| <i>N</i>                                                  | 601/936              | 367/680              | 331/619              |
| <b>OR RE (95% CI)</b>                                     | 0.35 (0.19, 0.64)    | 0.21 (0.13, 0.34)    | 0.33 (0.15, 0.72)    |
| <i>P</i> RE                                               | 0.0006               | 2·10 <sup>-10</sup>  | 0.0059               |
| <b>95% PI</b>                                             | 0.06, 1.91           | 0.13, 0.34           | 0.05, 2.12           |
| <b>OR FE (95% CI)</b>                                     | 0.29 (0.21, 0.39)    | 0.21 (0.13, 0.34)    | 0.25 (0.16, 0.39)    |
| <i>P</i> FE                                               | <1·10 <sup>-15</sup> | 2·10 <sup>-10</sup>  | 6·10 <sup>-10</sup>  |
| <i>I</i> <sup>2</sup> , %                                 | 64.5                 | 0                    | 59.3                 |
| $\tau^2$                                                  | 0.65                 | 0                    | 0.74                 |
| <i>SSE, P</i>                                             | 0.70                 | 0.60                 | NA                   |
| <b>LS</b>                                                 | Yes                  | Yes                  | Yes                  |
| <b>CES</b>                                                | IV                   | IV                   | IV                   |
| <b>Post-vaccination hemagglutination-inhibition titer</b> |                      |                      |                      |
| <i>k</i>                                                  | 17                   | 15                   | 12                   |
| <i>N</i>                                                  | 788/1100             | 554/844              | 518/783              |
| <b>g RE (95% CI)</b>                                      | -0.51 (-0.75, -0.27) | -0.77 (-1.11, -0.42) | -0.54 (-0.76, -0.32) |
| <i>P</i> RE                                               | 0.00003              | 0.00001              | 2·10 <sup>-6</sup>   |
| <b>95% PI</b>                                             | -1.38, 0.36          | -2.03, 0.49          | -1.13, 0.05          |
| <b>g FE (95% CI)</b>                                      | -0.43 (-0.53, -0.32) | -0.67 (-0.79, -0.55) | -0.51 (-0.64, -0.38) |
| <i>P</i> FE                                               | <1·10 <sup>-15</sup> | <1·10 <sup>-15</sup> | 2·10 <sup>-14</sup>  |
| <i>I</i> <sup>2</sup> , %                                 | 78.9                 | 86.5                 | 57.9                 |
| $\tau^2$                                                  | 0.18                 | 0.38                 | 0.08                 |
| <i>SSE, P</i>                                             | 0.26                 | 0.43                 | 0.48                 |
| <b>LS</b>                                                 | Yes                  | Yes                  | Yes                  |
| <b>CES</b>                                                | IV                   | IV                   | IV                   |

CES: cumulative evidence synthesis class; CI: confidence interval; FE: fixed-effects model; LS: the largest study has a statistically significant effect size; OR: odds ratio; PI: prediction interval; RE: random-effects model; SSE: small-study effect test

**Table S18.** Summary evidence of the effect of transplantation on the influenza vaccine-induced immune response, by immunogenicity parameter and viral (sub)type.

| Parameter                                                 | A/H1N1               | A/H3N2               | B                    |
|-----------------------------------------------------------|----------------------|----------------------|----------------------|
| <b>Seroconversion rate</b>                                |                      |                      |                      |
| <i>k</i>                                                  | 31                   | 26                   | 25                   |
| <i>N</i>                                                  | 1326/1008            | 955/888              | 910/820              |
| <b>OR RE (95% CI)</b>                                     | 0.49 (0.32, 0.75)    | 0.35 (0.23, 0.54)    | 0.54 (0.36, 0.82)    |
| <i>P</i> RE                                               | 0.0010               | 1·10 <sup>-6</sup>   | 0.0040               |
| <b>95% PI</b>                                             | 0.07, 3.58           | 0.07, 1.87           | 0.11, 2.71           |
| <b>OR FE (95% CI)</b>                                     | 0.53 (0.43, 0.65)    | 0.41 (0.33, 0.51)    | 0.59 (0.47, 0.73)    |
| <i>P</i> FE                                               | 1·10 <sup>-9</sup>   | <1·10 <sup>-15</sup> | 3·10 <sup>-6</sup>   |
| <i>I</i> <sub>2</sub> , %                                 | 74.0                 | 67.3                 | 65.5                 |
| $\tau^2$                                                  | 0.99                 | 0.68                 | 0.63                 |
| SSE, <i>P</i>                                             | 0.80                 | 0.37                 | 0.56                 |
| LS                                                        | Yes                  | Yes                  | No                   |
| CES                                                       | IV                   | IV                   | IV                   |
| <b>Seroprotection rate</b>                                |                      |                      |                      |
| <i>k</i>                                                  | 23                   | 16                   | 17                   |
| <i>N</i>                                                  | 1110/803             | 693/607              | 709/606              |
| <b>OR RE (95% CI)</b>                                     | 0.28 (0.19, 0.42)    | 0.26 (0.14, 0.47)    | 0.46 (0.29, 0.74)    |
| <i>P</i> RE                                               | 6·10 <sup>-10</sup>  | 8·10 <sup>-6</sup>   | 0.0013               |
| <b>95% PI</b>                                             | 0.08, 0.95           | 0.05, 1.45           | 0.12, 1.73           |
| <b>OR FE (95% CI)</b>                                     | 0.28 (0.21, 0.37)    | 0.30 (0.21, 0.43)    | 0.40 (0.30, 0.54)    |
| <i>P</i> FE                                               | <1·10 <sup>-15</sup> | 2·10 <sup>-10</sup>  | 4·10 <sup>-9</sup>   |
| <i>I</i> <sub>2</sub> , %                                 | 40.6                 | 53.9                 | 47.9                 |
| $\tau^2$                                                  | 0.32                 | 0.69                 | 0.40                 |
| SSE, <i>P</i>                                             | 0.11                 | >0.99                | 0.12                 |
| LS                                                        | Yes                  | Yes                  | Yes                  |
| CES                                                       | I                    | IV                   | IV                   |
| <b>Post-vaccination hemagglutination-inhibition titer</b> |                      |                      |                      |
| <i>k</i>                                                  | 17                   | 12                   | 12                   |
| <i>N</i>                                                  | 1063/780             | 642/607              | 616/652              |
| <b>g RE (95% CI)</b>                                      | -0.61 (-0.86, -0.35) | -0.89 (-1.15, -0.64) | -0.52 (-0.69, -0.36) |
| <i>P</i> RE                                               | 3·10 <sup>-6</sup>   | 4·10 <sup>-12</sup>  | 4·10 <sup>-10</sup>  |
| <b>95% PI</b>                                             | -1.57, 0.35          | -1.64, -0.14         | -0.88, -0.16         |
| <b>g FE (95% CI)</b>                                      | -0.50 (-0.61, -0.40) | -0.81 (-0.93, -0.69) | -0.49 (-0.61, -0.37) |
| <i>P</i> FE                                               | <1·10 <sup>-15</sup> | <1·10 <sup>-15</sup> | 3·10 <sup>-15</sup>  |
| <i>I</i> <sub>2</sub> , %                                 | 82.3                 | 72.8                 | 35.5                 |
| $\tau^2$                                                  | 0.22                 | 0.13                 | 0.03                 |
| SSE, <i>P</i>                                             | 0.12                 | 0.15                 | 0.27                 |
| LS                                                        | No                   | Yes                  | No                   |
| CES                                                       | III                  | IV                   | IV                   |

CES: cumulative evidence synthesis class; CI: confidence interval; FE: fixed-effects model; LS: the largest study has a statistically significant effect size; OR: odds ratio; PI: prediction interval; RE: random-effects model; SSE: small-study effect test

**Table S19.** Summary evidence of the effect of cancer on the influenza vaccine-induced immune response, by immunogenicity parameter and viral (sub)type.

| Parameter                                                 | A/H1N1               | A/H3N2               | B                    |
|-----------------------------------------------------------|----------------------|----------------------|----------------------|
| <b>Seroconversion rate</b>                                |                      |                      |                      |
| <i>k</i>                                                  | 31                   | 21                   | 17                   |
| <i>N</i>                                                  | 1326/1008            | 910/577              | 663/480              |
| <b>OR RE (95% CI)</b>                                     | 0.49 (0.32, 0.75)    | 0.44 (0.29, 0.66)    | 0.41 (0.30, 0.57)    |
| <i>P</i> RE                                               | 0.0010               | 0.00007              | 6·10 <sup>-8</sup>   |
| <b>95% PI</b>                                             | 0.07, 3.58           | 0.10, 1.86           | 0.26, 0.67           |
| <b>OR FE (95% CI)</b>                                     | 0.53 (0.43, 0.65)    | 0.50 (0.39, 0.64)    | 0.41 (0.31, 0.56)    |
| <i>P</i> FE                                               | 1·10 <sup>-9</sup>   | 4·10 <sup>-8</sup>   | 1·10 <sup>-8</sup>   |
| <i>I</i> <sup>2</sup> , %                                 | 74.0                 | 59.6                 | 7.5                  |
| $\tau^2$                                                  | 0.99                 | 0.51                 | 0.03                 |
| <i>SSE, P</i>                                             | 0.80                 | 0.48                 | 0.19                 |
| <b>LS</b>                                                 | Yes                  | Yes                  | Yes                  |
| <b>CES</b>                                                | III                  | IV                   | IV                   |
| <b>Seroprotection rate</b>                                |                      |                      |                      |
| <i>k</i>                                                  | 23                   | 14                   |                      |
| <i>N</i>                                                  | 1110/803             | 565/375              | 565/375              |
| <b>OR RE (95% CI)</b>                                     | 0.28 (0.19, 0.42)    | 0.37 (0.19, 0.73)    | 0.46 (0.26, 0.79)    |
| <i>P</i> RE                                               | 6·10 <sup>-10</sup>  | 0.0038               | 0.0052               |
| <b>95% PI</b>                                             | 0.08, 0.95           | 0.05, 2.84           | 0.10, 2.08           |
| <b>OR FE (95% CI)</b>                                     | 0.28 (0.21, 0.37)    | 0.52 (0.37, 0.75)    | 0.52 (0.36, 0.74)    |
| <i>P</i> FE                                               | <1·10 <sup>-15</sup> | 0.00042              | 0.00024              |
| <i>I</i> <sup>2</sup> , %                                 | 40.6                 | 65.8                 | 52.7                 |
| $\tau^2$                                                  | 0.34                 | 0.95                 | 0.52                 |
| <i>SSE, P</i>                                             | 0.11                 | 0.42                 | 0.83                 |
| <b>LS</b>                                                 | Yes                  | Yes                  | Yes                  |
| <b>CES</b>                                                | I                    | IV                   | IV                   |
| <b>Post-vaccination hemagglutination-inhibition titer</b> |                      |                      |                      |
| <i>k</i>                                                  | 17                   | 16                   | 13                   |
| <i>N</i>                                                  | 1063/780             | 565/506              | 480/401              |
| <b><i>g</i> RE (95% CI)</b>                               | -0.61 (-0.86, -0.35) | -0.54 (-0.77, -0.31) | -0.54 (-0.75, -0.36) |
| <i>P</i> RE                                               | 3·10 <sup>-6</sup>   | 6·10 <sup>-6</sup>   | 3·10 <sup>-7</sup>   |
| <b>95% PI</b>                                             | -1.57, 0.35          | -1.33, 0.26          | -1.11, 0.03          |
| <b><i>g</i> FE (95% CI)</b>                               | -0.50 (-0.61, -0.40) | -0.47 (-0.60, -0.35) | -0.52 (-0.66, -0.38) |
| <i>P</i> FE                                               | <1·10 <sup>-15</sup> | 2·10 <sup>-13</sup>  | 3·10 <sup>-13</sup>  |
| <i>I</i> <sup>2</sup> , %                                 | 82.3                 | 69.0                 | 52.5                 |
| $\tau^2$                                                  | 0.22                 | 0.15                 | 0.07                 |
| <i>SSE, P</i>                                             | 0.12                 | 0.082                | 0.49                 |
| <b>LS</b>                                                 | No                   | No                   | Yes                  |
| <b>CES</b>                                                | III                  | IV                   | IV                   |

CES: cumulative evidence synthesis class; CI: confidence interval; FE: fixed-effects model; LS: the largest study has a statistically significant effect size; OR: odds ratio; PI: prediction interval; RE: random-effects model; SSE: small-study effect test

**Table S20.** Subgroup analysis (by age-class) of the summary evidence of the effect of latent cytomegalovirus (CMV) infection on the influenza vaccine-induced immune response.

| Parameter                                                 | A/H1N1                    | A/H3N2              | B                   |
|-----------------------------------------------------------|---------------------------|---------------------|---------------------|
| <b>Seroconversion rate</b>                                |                           |                     |                     |
| Adults                                                    | <i>k</i>                  | 3                   | NA                  |
|                                                           | <i>N</i>                  | 85/46               | NA                  |
|                                                           | OR RE (95% CI)            | 0.33 (0.04, 2.70)   | NA                  |
|                                                           | OR FE (95% CI)            | 0.35 (0.12, 0.99)   | NA                  |
|                                                           | <i>I</i> <sup>2</sup> , % | 71.5                | NA                  |
| Elderly                                                   | <i>k</i>                  | 3                   | 6                   |
|                                                           | <i>N</i>                  | 107/37              | 662/187             |
|                                                           | OR RE (95% CI)            | 0.63 (0.13, 3.04)   | 1.04 (0.73, 1.49)   |
|                                                           | OR FE (95% CI)            | 0.86 (0.35, 2.11)   | 1.04 (0.73, 1.49)   |
|                                                           | <i>I</i> <sup>2</sup> , % | 63.9                | 0                   |
| <b>Sero-protection rate</b>                               |                           |                     |                     |
| Adults                                                    | <i>k</i>                  | NA                  | NA                  |
|                                                           | <i>N</i>                  | NA                  | NA                  |
|                                                           | OR RE (95% CI)            | NA                  | NA                  |
|                                                           | OR FE (95% CI)            | NA                  | NA                  |
|                                                           | <i>I</i> <sup>2</sup> , % | NA                  | NA                  |
| Elderly                                                   | <i>k</i>                  | NA                  | 4                   |
|                                                           | <i>N</i>                  | NA                  | 571/160             |
|                                                           | OR RE (95% CI)            | NA                  | 1.08 (0.74, 1.56)   |
|                                                           | OR FE (95% CI)            | NA                  | 1.08 (0.74, 1.56)   |
|                                                           | <i>I</i> <sup>2</sup> , % | NA                  | 0                   |
| <b>Post-vaccination hemagglutination-inhibition titer</b> |                           |                     |                     |
| Adults                                                    | <i>k</i>                  | 5                   | NA                  |
|                                                           | <i>N</i>                  | 299/168             | NA                  |
|                                                           | OR RE (95% CI)            | -0.28 (-0.78, 0.20) | NA                  |
|                                                           | OR FE (95% CI)            | -0.12 (-0.32, 0.07) | NA                  |
|                                                           | <i>I</i> <sup>2</sup> , % | 77.2                | NA                  |
| Elderly                                                   | <i>k</i>                  | 2                   | 6                   |
|                                                           | <i>N</i>                  | 72/53               | 671/229             |
|                                                           | OR RE (95% CI)            | -0.17 (-0.52, 0.19) | -0.08 (-0.26, 0.11) |
|                                                           | OR FE (95% CI)            | -0.17 (-0.52, 0.19) | -0.07 (-0.22, 0.08) |
|                                                           | <i>I</i> <sup>2</sup> , % | 0                   | 29.9                |

CI: confidence interval; FE: fixed-effects model; OR: odds ratio; RE: random-effects model

**Table S21.** Pooled estimates extracted from the available meta-analyses [41] of the effect of psychological stress on the influenza vaccine-induced immune response.

| <b>Stressor</b>  | <b>Age group</b> | <b><i>k</i></b> | <b><i>N</i></b> | <b>Model</b> | <b>ESR (95% CI)</b>  | <b><i>P</i></b> |
|------------------|------------------|-----------------|-----------------|--------------|----------------------|-----------------|
| Chronic stress   | Any              | 6               | 493             | FE           | -0.18 (-0.28, -0.08) | 0.001           |
| Life events      | Any              | 6               | 514             | RE           | -0.18 (-0.27, -0.09) | 0.0001          |
| Perceived stress | Any              | 3               | 151             | RE           | -0.18 (-0.33, -0.02) | 0.02            |
| Any              | Younger          | 6               | 466             | FE           | -0.17 (-0.27, -0.07) | 0.001           |
| Any              | Older            | 6               | 568             | FE           | -0.25 (-0.34, -0.15) | 0.0001          |

CI: confidence interval; ESR: effect size correlation coefficient; FE: fixed-effects model; RE: random-effects model

**Table S22.** Distribution of cumulative evidence synthesis classes and mean Cohen's *ds*, by viral (sub)type.

| <b>Parameter</b>                  | <b>A/H1N1 (<i>k</i>=34)</b> | <b>A/H3N2 (<i>k</i>=33)</b> | <b>B (<i>k</i>=30)</b> |
|-----------------------------------|-----------------------------|-----------------------------|------------------------|
| <b>CES I, <i>N</i> (%)</b>        | 4 (12)                      | 0 (0)                       | 0 (0)                  |
| <b>CES II, <i>N</i> (%)</b>       | 6 (18)                      | 4 (12)                      | 1 (3)                  |
| <b>CES III, <i>N</i> (%)</b>      | 6 (18)                      | 1 (3)                       | 2 (7)                  |
| <b>CES IV, <i>N</i> (%)</b>       | 8 (24)                      | 14 (42)                     | 12 (40)                |
| <b>CES ns, <i>N</i> (%)</b>       | 10 (29)                     | 14 (42)                     | 15 (50)                |
| <b>Mean <math> d </math> (SD)</b> | 0.17 (0.17)                 | 0.16 (0.21)                 | 0.12 (0.16)            |

CES: cumulative evidence synthesis class; SD: standard deviation
